# Supplementary material for: Assessment of the effects of transforming growth factor beta1 (TGF-β1)-Smad2/3 on fibrosis in rat myofascial trigger points using point shear wave elastography
Source: PeerJ. 2023 Dec 6;11:e16588. doi: 10.7717/peerj.16588 (PMC10710175; doi:10.7717/peerj.16588)
Supplement: Supplemental Information 2 — Ultrasound findings. [file peerj-11-16588-s002.xls]

## Sheet: Sheet1
	MTrPs
		STQ（Average m/s）
1
	1	3.45
	2	3.08
	3	3.5
	4	3.32
	5	3.5
	6	3.99
	7	4.26
	8	4.31
	9	2.98
	10	2.36
	11	2.82
	12	2.68
	13	2.93
2
	1	3.19
	2	2.77
	3	4.61
	4	2.45
	5	3.05
	6	3.2
	7	3.21
	8	4.09
	9	3.18
	10	2.8
	11	3.74
	12	5.97
	13	3.51
	14	3.61
	15	3.2
	16	2.4
	17	2.8
	18	2.89
	19	3.64
	20	2.88
	21	2.19
	22	2.5
	23	4.37
	24	4.56
	25	4.41
	26	4.33
	27	3.89
	28	4.19
	29	3.29
	30	2.69
	31	3.06
	32	3.08
	33	2.89
	34	3.05
	35	3.4
3
	1	3.87
	2	3.67
	3	3.84
	4	4.1
	5	3.72
	6	3.76
	7	3.76
4
	1	2.56
	2	3.25
	3	2.96
	4	3.38
	5	2.91
	6	2.58
	7	2.89
	8	3.02
	9	2.85
	10	3.6
	11	3.12
	12	2.94
	13	3.22
	14	3.57
	15	3.35
	16	3.59
	17	3.37
	18	3.75
5
	1	2.82
	2	2.57
	3	3.02
	4	3.05
	5	3.29
	6	3.49
	7	3.06
	8	3.16
6
	1	3.09
	2	3.13
	3	2.95
	4	3.31
	5	3.1
	6	3.69
	7	3.77
	8	3.55
	9	3.16
	10	3.56
	11	3.08
	12	3.22
	13	5.18
	14	3.8
	15	2.93
	16	2.98
7
	1	3.59
	2	3.16
	3	3.42
	4	3.29
	5	3.05
	6	3.64
	7	3.07
	8	3.46
	9	3.43
	10	3.32
	11	3.81
	12	3.58
	13	3.87
	14	3.47
	15	3.86
8
	1	4.11
	2	3.63
	3	3.52
	4	4.49
	5	3.77
	6	3.01
	7	4.23
	8	3.5
	9	3.63
	10	3.8
	11	3.26
	12	3.19
	13	3.34
	14	3.32
	15	2.98
	16	4.12
	17	4.01
	18	4.99
	19	3.62
	20	3.46
	21	3.75
9
	1	4.15
	2	3.86
	3	4.25
	4	3.69
	5	3.54
	6	3.53
	7	3.32
	8	3.01
	9	3.47
	10	3.43
	11	3.21
	12	3.29
	13	3.37
	14	3.47
	15	3.33
	16	3.57
	17	3.08
	18	3.42
	19	4.07
	20	3.18
	21	3.88
10
	1	3.15
	2	3.53
	3	3.63
	4	3.85
	5	3.87
	6	3.27
	7	3.16
	8	3.95
	9	4.34
	10	3.18
	11	3.3
	12	3.08
	13	3.68
	14	3.59
	15	3.54
	16	3.6
	17	4.98
11
	1	4.57
	2	3.69
	3	3.38
	4	3.96
	5	3.89
	6	3.52
	7	3.57
	8	4.59
	9	4.49
	10	4.76
	11	4.21
	12	4.02
	13	4.9
	14	4.77
	15	4.73
12
	1	4.54
	2	4.27
	3	4.47
	4	4.44
	5	4.82
	6	4.34
	7	4.13
	8	3.73
	9	3.71
	10	3.9
	11	3.7
	12	3.52
	13	3.43
13
	1	4.23
	2	3.83
	3	3.28
	4	4.1
	5	4.04
	6	3.52
	7	3.3
	8	3.21
	9	3.91
	10	3.77
	11	4.95
	12	5.59
14
	1	3.75
	2	3.45
	3	3.64
	4	4.09
	5	3.53
	6	3.29
	7	3.98
	8	3.44
	9	3.2
	10	3.24
15
	1	3.86
	2	4.14
	3	3.65
	4	3.24
	5	3.96
	6	3.89
	7	3.41
	8	4.27
	Control
		STQ（Average m/s）
1
	1	2.55
	2	2.63
	3	2.63
	4	2.33
2
	1	2.22
	2	2.74
	3	2.76
	4	2.75
3
	1	2.45
	2	2.29
	3	2.1
	4	2.12
4
	1	2.37
	2	2.02
	3	2.35
	4	2.26
5
	1	2.11
	2	2.07
	3	1.9
	4	1.8
	5	1.9
6
	1	2.49
	2	2.18
	3	2
	4	2.78
7
	1	2.26
	2	2.7
	3	1.84
	4	2.87
	5	2.64
8
	1	2.68
	2	2.11
	3	2.18
9
	1	2.43
	2	2.66
	3	1.8
	4	1.9
	5	2.88
10
	1	2.75
	2	2.15
	3	2.64
	4	2.42
	5	2.8
	6	2.98
