# Supplementary material for: Assessment of the effects of transforming growth factor beta1 (TGF-β1)-Smad2/3 on fibrosis in rat myofascial trigger points using point shear wave elastography
Source: PeerJ. 2023 Dec 6;11:e16588. doi: 10.7717/peerj.16588 (PMC10710175; doi:10.7717/peerj.16588)
Supplement: Supplemental Information 3 — Comparison of sarcomere length and the number of mitochondria between the MTrP group and the control group [file peerj-11-16588-s003.xls]

## Sheet: mitochondria
1	17
1	10
1	12
1	7
1	15
1	9
1	19
1	10
1	11
1	7
1	9
1	4
1	6
1	3
1	8
1	6
1	6
1	10
1	10
1	12
1	13
1	14
1	13
1	17
1	16
1	17
1	13
1	9
1	6
1	18
2	20
2	17
2	21
2	11
2	16
2	15
2	18
2	16
2	17
2	21
2	19
2	20
2	16
2	14
2	13
2	15
2	15
2	18
2	10
2	17
2	15
2	16
2	14
2	17
2	19
2	16
2	12
2	18
2	14
2	16
1=M
2=C

## Sheet: sarcomeres
1	1.87551
1	1.92521
1	1.99046
1	2.0137
1	2.00281
1	1.90618
1	1.97646
1	1.87646
1	1.85699
1	2.00333
1	1.67341
1	1.75206
1	1.7531
1	1.73933
1	1.81278
1	1.94351
1	2.00333
1	2.08168
1	1.92809
1	1.99377
1	1.9351
1	2.0577
1	2.00886
1	1.97646
1	1.95864
1	1.80981
1	1.88406
1	1.79493
1	1.84528
1	1.85472
2	1.94351
2	2.00333
2	2.08168
2	1.92809
2	1.99377
2	1.9351
2	2.0577
2	2.00886
2	1.97646
2	1.95864
2	1.80981
2	1.88406
2	1.84528
2	1.84472
2	2.0477
2	1.94472
2	1.95964
2	1.93809
2	1.95809
2	2.03809
2	1.97809
2	2.05864
2	1.93809
2	2.08636
2	1.88906
2	2.05846
2	1.89406
2	2.03886
2	1.89472
2	2.01886
1=M
2=C
