# Supplementary material for: Assessment of the effects of transforming growth factor beta1 (TGF-β1)-Smad2/3 on fibrosis in rat myofascial trigger points using point shear wave elastography
Source: PeerJ. 2023 Dec 6;11:e16588. doi: 10.7717/peerj.16588 (PMC10710175; doi:10.7717/peerj.16588)
Supplement: Supplemental Information 4 — The expression of TGF-β1 and Smad2/3 proteins in the vastus medialis muscle of rats was determined by IHC [file peerj-11-16588-s004.xls]

## Sheet: Smad2，3
1	0.009735
1	0.008484
1	0.012488
1	0.00821
1	0.00955
1	0.0079
1	0.0085
1	0.0096
1	0.0093
1	0.0123
1	0.011
1	0.011856
1	0.009244
1	0.0095
1	0.0098
2	0.008235
2	0.009082
2	0.010088
2	0.00851
2	0.00875
2	0.0083
2	0.008683
2	0.00799
2	0.008635
2	0.00823
1=M
2=C

## Sheet: TGF-β1
1	0.008009
1	0.008513
1	0.009786
1	0.008956
1	0.00945
1	0.01023
1	0.00999
1	0.0127
1	0.01136
1	0.01189
1	0.00921
1	0.01203
1	0.01123
1	0.01357
1	0.01569
2	0.008009
2	0.008513
2	0.009786
2	0.008956
2	0.00945
2	0.01003
2	0.00999
2	0.008927
2	0.008036
2	0.009589
1=M
2=C
