# Supplementary material for: Assessment of the effects of transforming growth factor beta1 (TGF-β1)-Smad2/3 on fibrosis in rat myofascial trigger points using point shear wave elastography
Source: PeerJ. 2023 Dec 6;11:e16588. doi: 10.7717/peerj.16588 (PMC10710175; doi:10.7717/peerj.16588)
Supplement: Supplemental Information 5 — Collagen fibre volume fraction [file peerj-11-16588-s005.xls]

## Sheet: Sheet1
1	3.16
1	4.25
1	2.16
1	6.6
1	3.7
1	5.75
1	4.05
1	6.87
1	6
1	9.62
1	8.26
1	7.87
1	10.62
1	7.97
1	10.02
2	1.41
2	0.71
2	0.16
2	1.66
2	1.13
2	1.31
2	0.81
2	0.26
2	1.46
2	1.63
1=M
2=C
